# Supplementary material
Source: PubMed Central journal article supplement (PMC2849824)

# Supplementary figure 1, Sasseville et al.

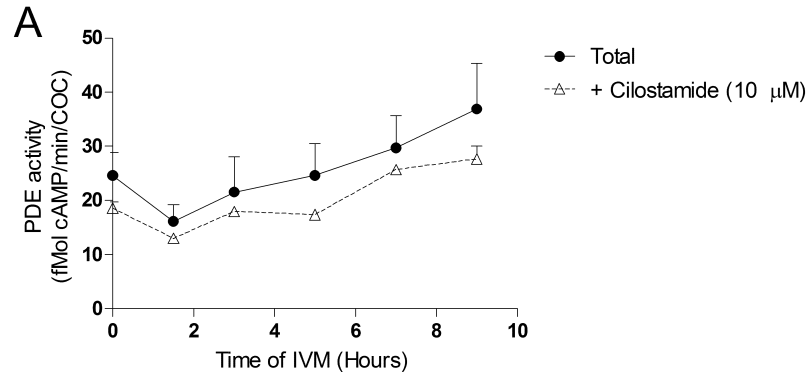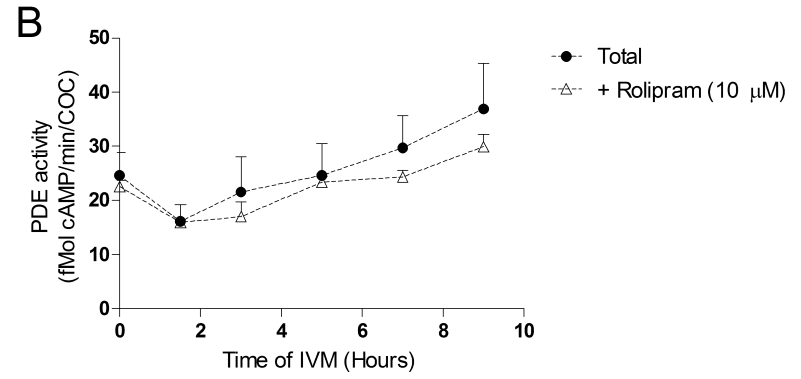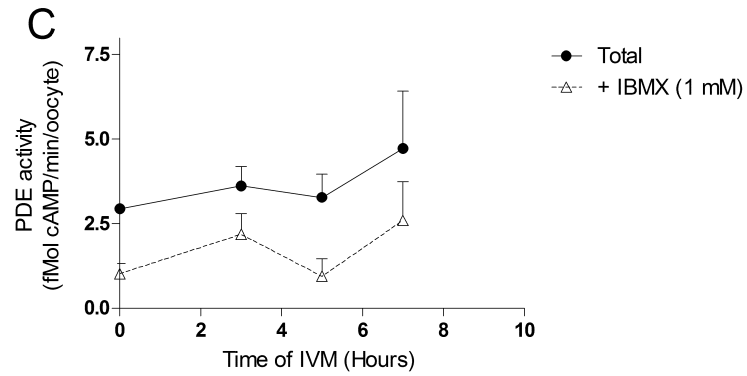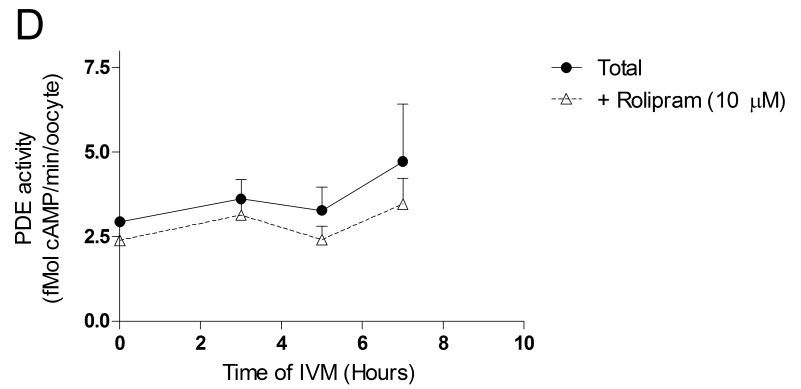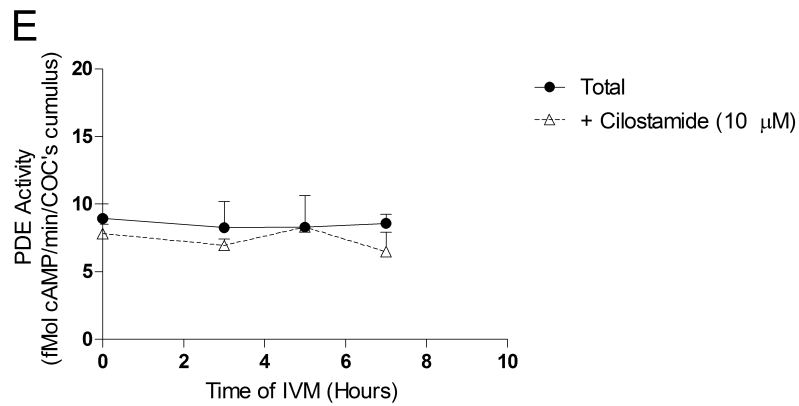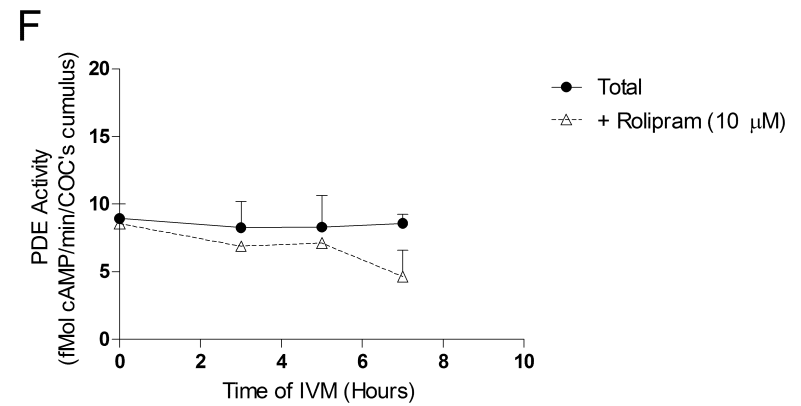

Supplement: supp_108.074450_biolreprod.108.074450-1.pdf [file supp_108.074450_biolreprod.108.074450-1.pdf]
